# Supplementary material for: Automated reference tissue normalization of T2-weighted MR images of the prostate using object recognition
Source: PubMed Central journal article supplement (PMC8018925; doi:10.1007/s10334-020-00871-3), 2020-07-31

## Online Resource 2

### ***All suboptimal automatically extracted ROIs using AutoRef and their impact on the normalization***

#### **The suboptimal ROIs impact on the normalization:**

To measure the suboptimal ROIs impact on the normalization, we compared the medians of the histogram intersections of all the cases with suboptimal ROIs with an equivalent number (overall and per dataset) of randomly selected cases with optimal ROIs. For each case, the median of the histogram intersections with the rest of its dataset cases, excluding those with suboptimal ROIs, was taken. Wilcoxon signed rank test was used to assess the statistical difference and  $p$ -values less than 0.05 were considered statistically significant. The test showed no significant difference between the medians ( $p=0.278$ ).

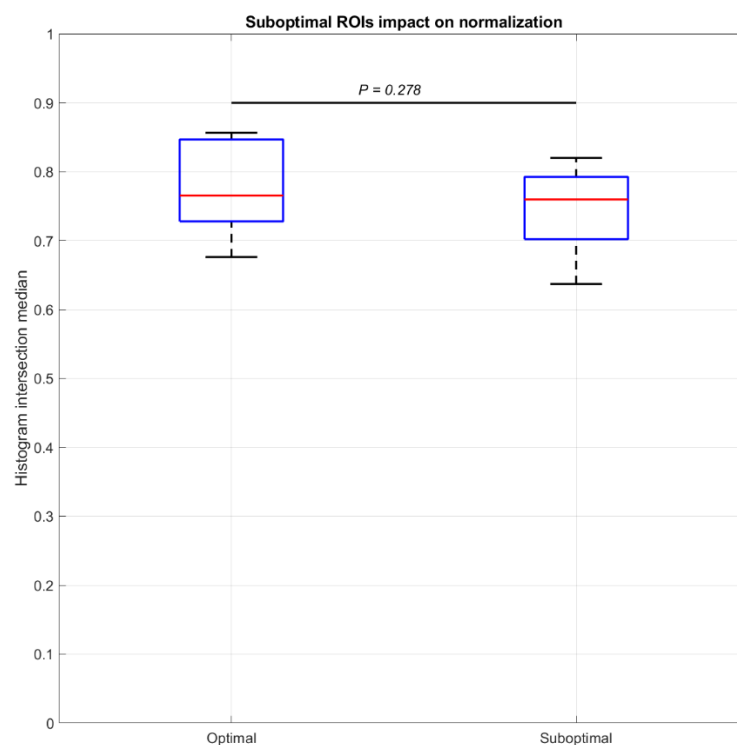

**The suboptimal automatically extracted ROIs using AutoRef:**

Below, each row represents a case, while the columns are the 3 detected regions-of-interest (ROIs) for that case. The fat ROIs are in green and the muscle ROIs are in red. Under each case of PROMISE12 test subset, the absolute relative difference of the reference intensity values between the manual and automated approach has been given.

**Criteria:**

A case was considered a suboptimal when any of its extracted ROIs failed to detect the fat or muscle tissue, or covered additional regions not belonging to fat or muscle.

# PROMISE12 test subset

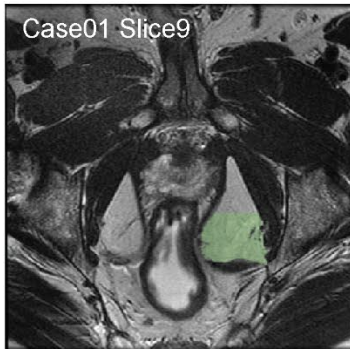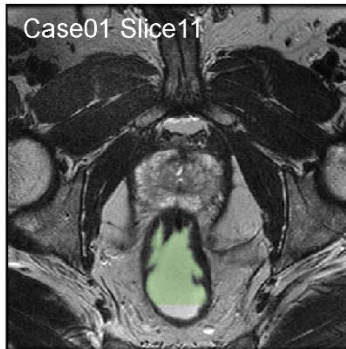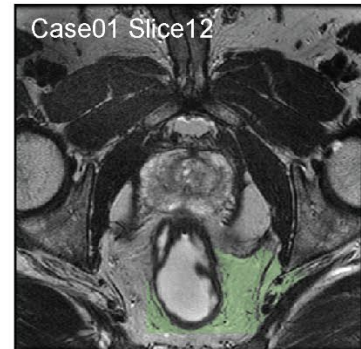

The absolute relative difference = 16.37%

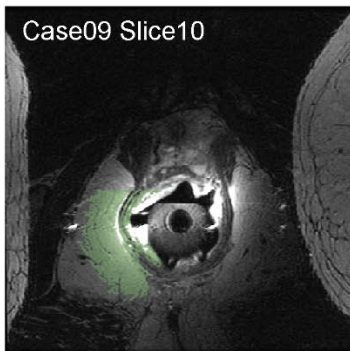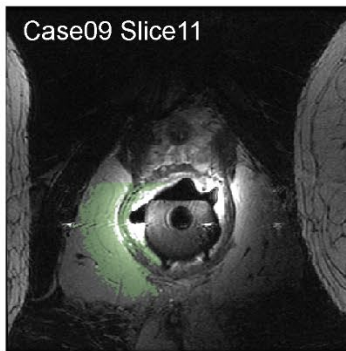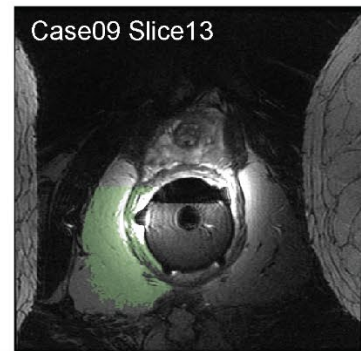

The absolute relative difference = 29.46%

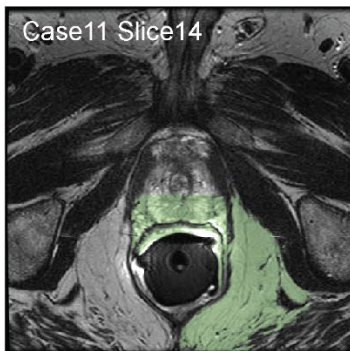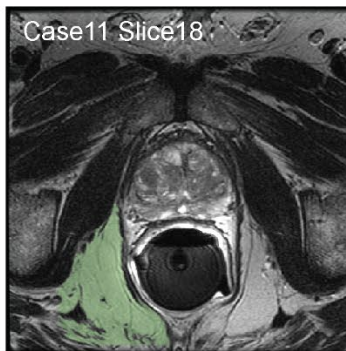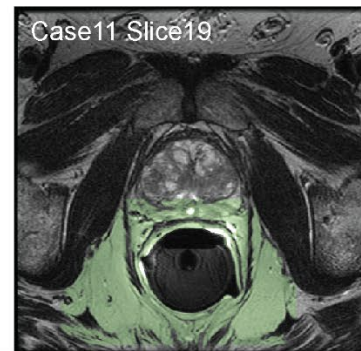

The absolute relative difference = 6.96%

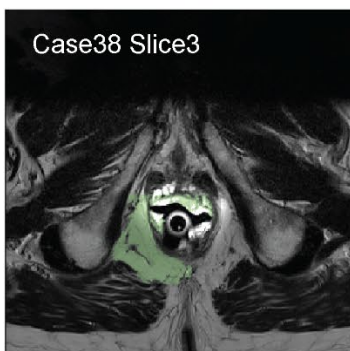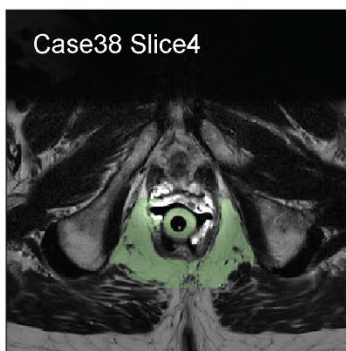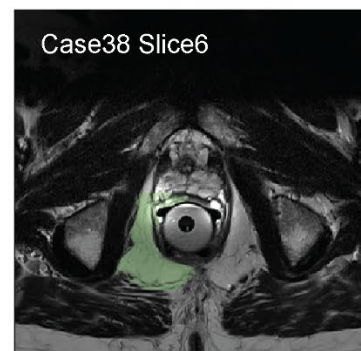

The absolute relative difference = 39.86%



# PROSTATEx dataset

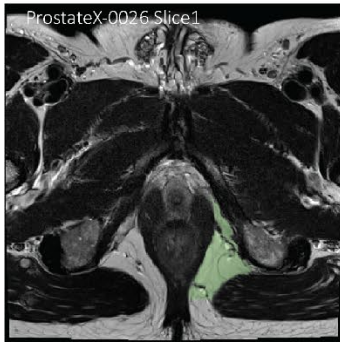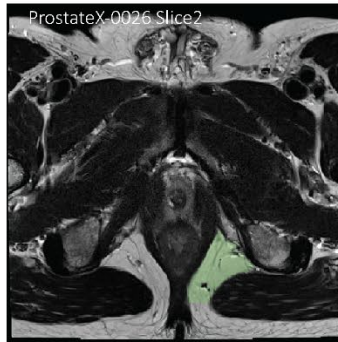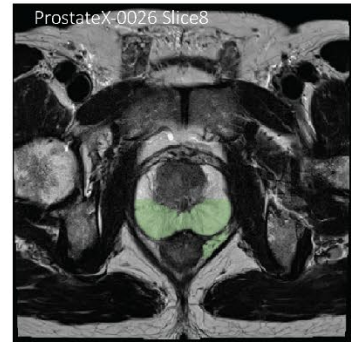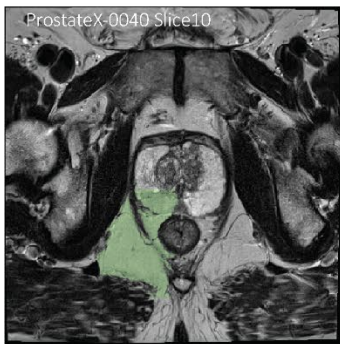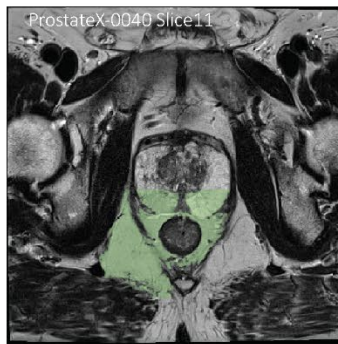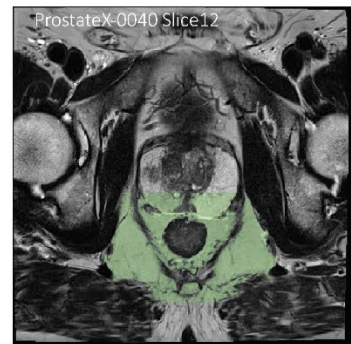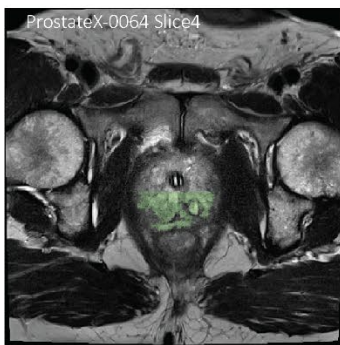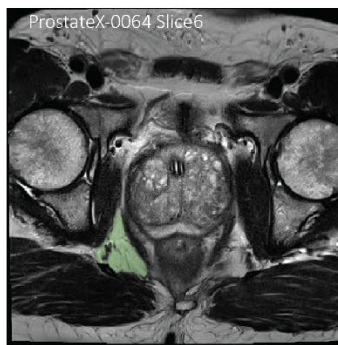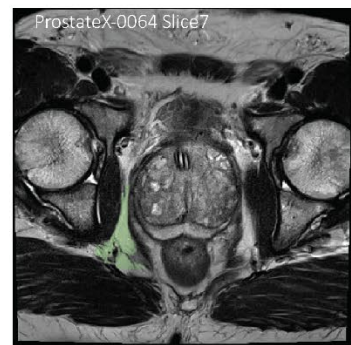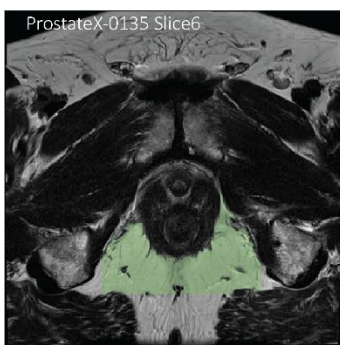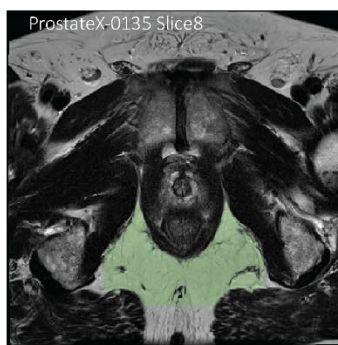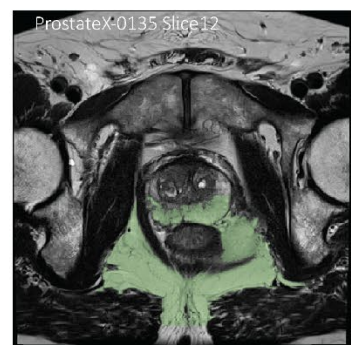

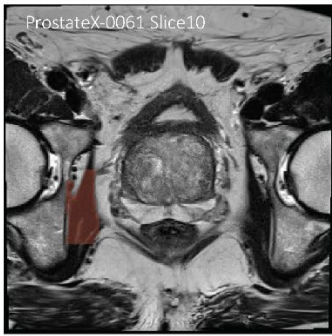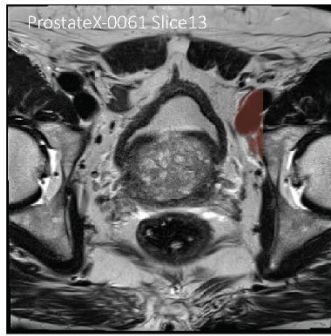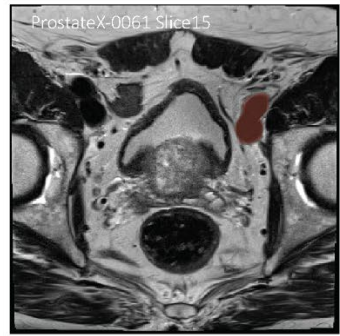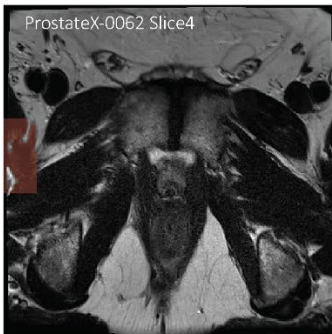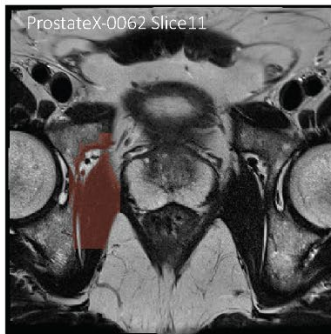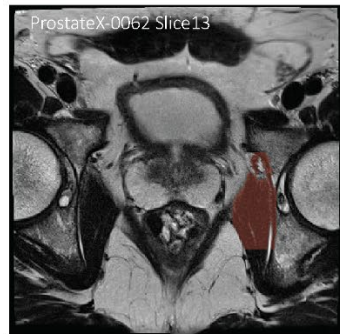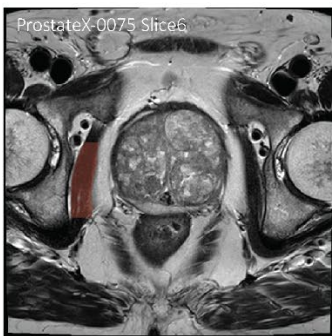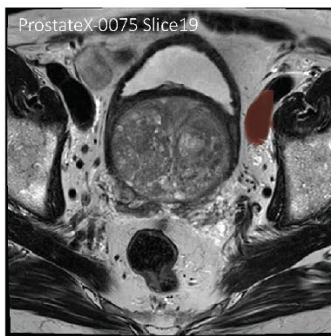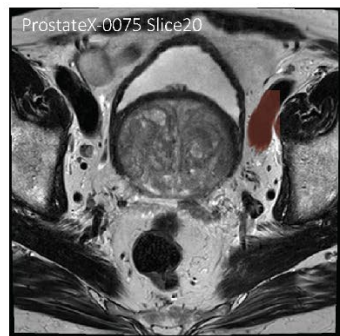

Supplement: 10334_2020_871_MOESM2_ESM.pdf [file 10334_2020_871_MOESM2_ESM.pdf]
