# Supplementary material for: Automated reference tissue normalization of T2-weighted MR images of the prostate using object recognition
Source: PubMed Central journal article supplement (PMC8018925; doi:10.1007/s10334-020-00871-3), 2020-07-31
Supplement: 10334_2020_871_MOESM1_ESM.pdf [file 10334_2020_871_MOESM1_ESM.pdf]

## Online Resource 1

### **Optimization of the AutoRef pre- and post-processing settings on the validation set**

We optimized the following pre- and post-processing parameters on the validation set: type of scaling, number of the detector training stages, radius of the morphological opening structure, number of the evaluated slices, low (muscle) and high (fat) percentiles used to calculate the reference intensity values and focus regions (inferior-superior slices and posterior-anterior rows) for fat and muscle. The table below lists the effect on the median histogram intersection (HI) when changing one parameter at the time, while keeping the other parameters set at the **bold** values. The **bold** set of parameters was considered our optimal set as no further improvements of more than 1% could be achieved by additional tuning of the parameters (i.e. Change in HI median < 1% for all parameter values).

| Settings                                      | HI median  | Change in HI median (%) | Selected as an optimal |
|-----------------------------------------------|------------|-------------------------|------------------------|
| <i>Scaling</i>                                |            |                         |                        |
| <b>99th Percentile</b>                        | 0.76997959 | <b>0</b>                | <b>X</b>               |
| Median                                        | 0.77183996 | 0.241613039             |                        |
| Max                                           | 0.76662009 | -0.436310938            |                        |
| None                                          | 0.75950878 | -1.359881374            |                        |
| <i>Number of detector Stages</i>              |            |                         |                        |
| 1                                             | 0.77192269 | 0.252357431             |                        |
| <b>2</b>                                      | 0.76997959 | <b>0</b>                | <b>X</b>               |
| 3                                             | 0.76997959 | 0                       |                        |
| 4                                             | 0.76997959 | 0                       |                        |
| 5                                             | 0.76997959 | 0                       |                        |
| <i>Morphological opening structure radius</i> |            |                         |                        |
| <b>1</b>                                      | 0.76997959 | <b>0</b>                | <b>X</b>               |
| 2                                             | 0.77002793 | 0.006277583             |                        |
| 3                                             | 0.7677967  | -0.283500407            |                        |
| 4                                             | 0.76807893 | -0.246846188            |                        |
| 5                                             | 0.7675968  | -0.309461357            |                        |
| <i>Number of evaluated Slices</i>             |            |                         |                        |
| 1                                             | 0.76806568 | -0.248566275            |                        |
| 2                                             | 0.77272643 | 0.356741256             |                        |
| <b>3</b>                                      | 0.76997959 | <b>0</b>                | <b>X</b>               |
| 4                                             | 0.76859372 | -0.179988324            |                        |
| 5                                             | 0.77103737 | 0.137376853             |                        |

| <i>Low percentile (Muscle)</i>      |            |              |          |
|-------------------------------------|------------|--------------|----------|
| 25                                  | 0.7736801  | 0.48059794   |          |
| 20                                  | 0.77221788 | 0.290693982  |          |
| 15                                  | 0.77017365 | 0.025203469  |          |
| <b>10</b>                           | 0.76997959 | <b>0</b>     | <b>X</b> |
| 5                                   | 0.76839093 | -0.206325746 |          |
| <i>High percentile (Fat)</i>        |            |              |          |
| 75                                  | 0.76036739 | -1.044199148 |          |
| 80                                  | 0.76423774 | -0.540504432 |          |
| 85                                  | 0.76676418 | -0.211708731 |          |
| <b>90</b>                           | 0.76839093 | <b>0</b>     | <b>X</b> |
| 95                                  | 0.76178638 | -0.859529925 |          |
| <i>Focus Region Slices (Fat)</i>    |            |              |          |
| All [0-100%]                        | 0.76997959 | 0            |          |
| Lower Half [0-50%]                  | 0.76997959 | 0            |          |
| <b>lower 75% [0-75%]</b>            | 0.76997959 | <b>0</b>     | <b>X</b> |
| Middle [25%-75%]                    | 0.76964891 | -0.042946643 |          |
| Upper Half [50%-100%]               | 0.74567085 | -3.157063397 |          |
| Upper 75% [25%-100%]                | 0.76964891 | -0.042946643 |          |
| <i>Focus Region Rows (Fat)</i>      |            |              |          |
| All [0-100%]                        | 0.76968231 | -0.03860894  |          |
| <b>Lower Half [0-50%]</b>           | 0.76997959 | <b>0</b>     | <b>X</b> |
| lower 75% [0-75%]                   | 0.76968231 | -0.03860894  |          |
| Middle [25%-75%]                    | 0.75187963 | -2.3507062   |          |
| Upper 75% [25%-100%]                | 0.75562408 | -1.864402074 |          |
| <i>Focus Region Slices (Muscle)</i> |            |              |          |
| All [0-100%]                        | 0.77053318 | 0.071896978  |          |
| Lower Half [0-50%]                  | 0.7737537  | 0.490156996  |          |
| lower 75% [0-75%]                   | 0.76997959 | 0            |          |
| <b>Middle [25%-75%]</b>             | 0.76997959 | <b>0</b>     | <b>X</b> |
| Upper Half [50%-100%]               | 0.7679594  | -0.262369737 |          |
| Upper 75% [25%-100%]                | 0.77053318 | 0.071896978  |          |
| <i>Focus Region Rows (Muscle)</i>   |            |              |          |
| All [0-100%]                        | 0.76913026 | -0.110305212 |          |
| Lower Half [0-50%]                  | 0.76709563 | -0.374550451 |          |
| lower 75% [0-75%]                   | 0.76913026 | -0.110305212 |          |
| <b>Middle [25%-75%]</b>             | 0.76997959 | <b>0</b>     | <b>X</b> |
| Upper 75% [25%-100%]                | 0.76912854 | -0.110528935 |          |
