# Supplementary material for: Automated reference tissue normalization of T2-weighted MR images of the prostate using object recognition
Source: PubMed Central journal article supplement (PMC8018925; doi:10.1007/s10334-020-00871-3), 2020-07-31

## Online Resource 3

*A visual representation of the image intensity histograms from the original and normalized images of PROMISE12 test subset. AutoRef is our proposed method*

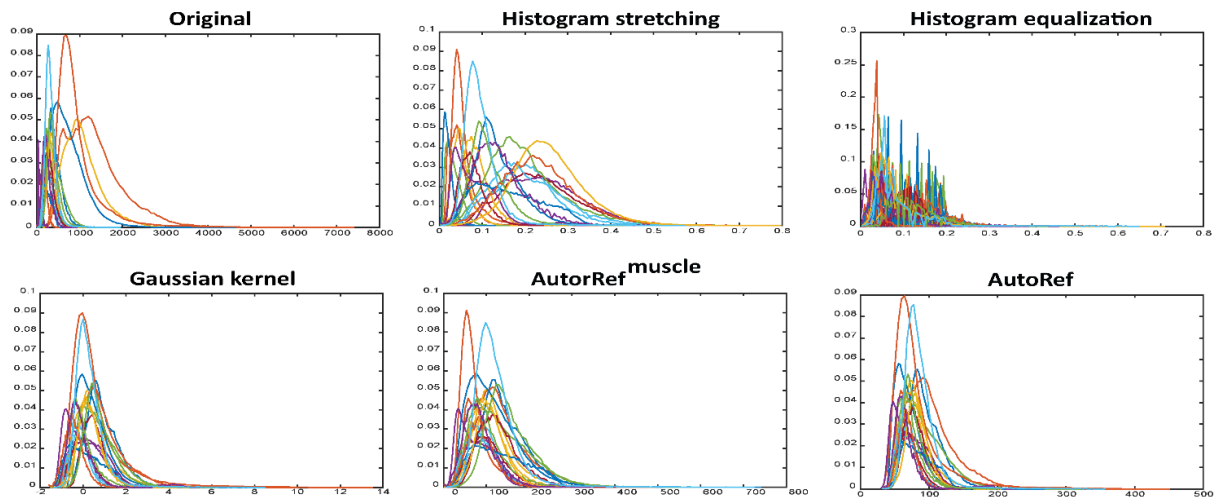

Supplement: 10334_2020_871_MOESM3_ESM.pdf [file 10334_2020_871_MOESM3_ESM.pdf]
